# Supplementary material for: Anti-Breast Cancer Potential of Quercetin via the Akt/AMPK/Mammalian Target of Rapamycin (mTOR) Signaling Cascade
Source: PubMed Central journal article supplement (PMC4902235; doi:10.1371/journal.pone.0157251), 2016-06-10

# Supporting Information File 1

## Figure A.

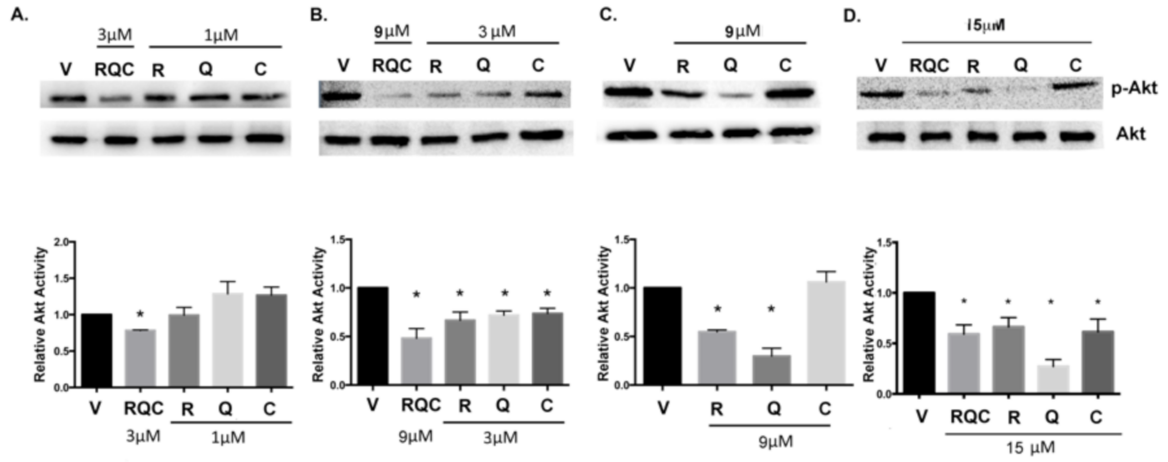

## Figure B.

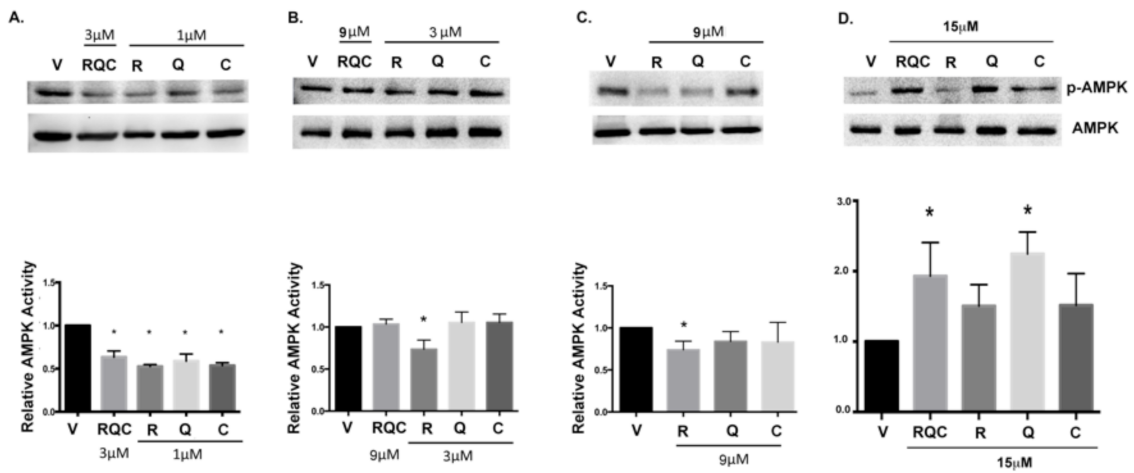

Figure C.

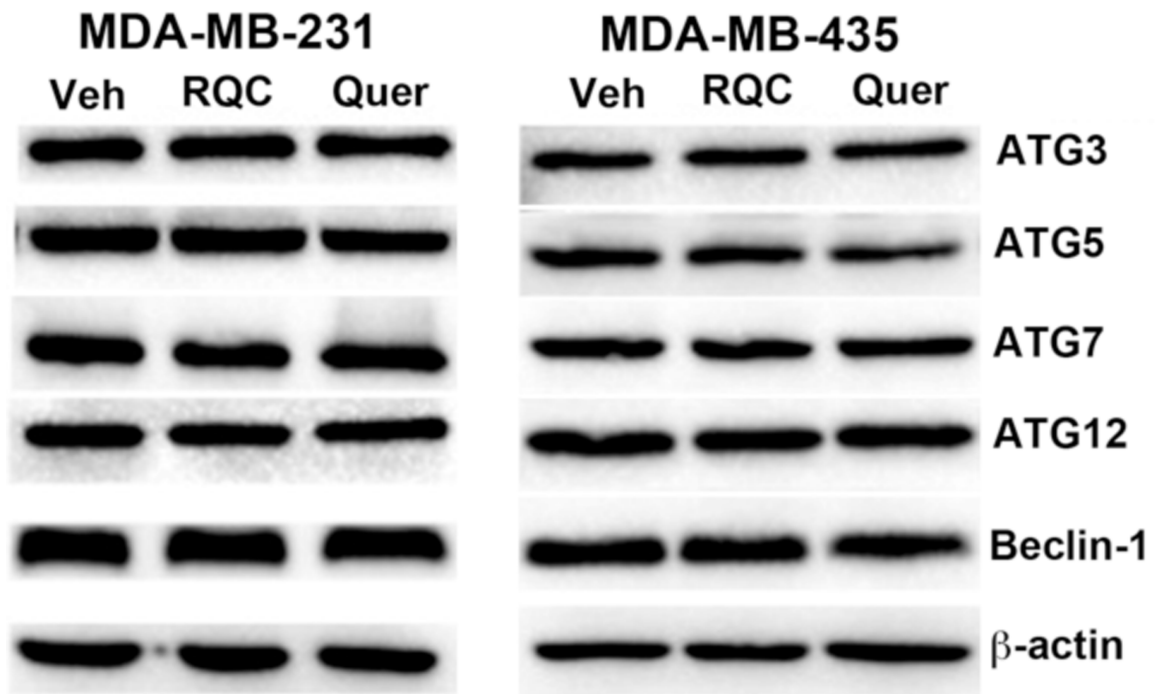

Supplement: pone.0157251.s001.pdf [file pone.0157251.s001.pdf]
